# Supplementary material
Source: MDPI journal article supplement (https://www.mdpi.com/1996-1073/15/9/3252)
Supplement: s1 [file s1]

## **Supplementary information for: Biogas production and microbial communities of mesophilic and thermophilic anaerobic co-digestion of animal manures and food wastes in Costa Rica**

**Murillo-Roos Mariana<sup>1</sup>, Uribe-Lorío Lorena<sup>2</sup>, Fuentes-Schweizer Paola<sup>3</sup>, Vidaurre-Barahona Daniela<sup>2</sup>, Brenes-Guillén Laura<sup>2</sup>, Jiménez Ivannia<sup>3</sup>, Arguedas Tatiana<sup>1</sup>, Wei Liao<sup>4</sup>, Uribe Lidieth<sup>1,\*</sup>**

\*Corresponding author

Lidieth Uribe Lorío  
Laboratorio de Microbiología Agrícola  
Centro de Investigaciones Agronómicas  
San José, Costa Rica  
Email: lidieth.uribe@ucr.ac.cr

### **Contents:**

Supplementary Table S1: Preparation of feed mixtures.

Supplementary Table S2. Fiber composition of the feed mixtures.

Supplementary Figure S1: Shannon diversity and Chao richness indices.

Supplementary Figure S2: Bayesian tree of OTU classified as Euryarchaeota.

**Supplementary Table S1. Preparation of feed mixtures**

| <b>Feed mixture<br/>(FM)</b> | <b>Dairy manure<br/>(% dry matter)</b> | <b>Chicken litter<br/>(% dry matter)</b> | <b>Fruits and<br/>vegetables<br/>(% dry matter)</b> | <b>Post-consumer<br/>food wastes<br/>(% dry matter)</b> |
|------------------------------|----------------------------------------|------------------------------------------|-----------------------------------------------------|---------------------------------------------------------|
| FM1                          | 50                                     | 50                                       | 0                                                   | 0                                                       |
| FM2                          | 45                                     | 45                                       | 5                                                   | 5                                                       |
| FM3                          | 40                                     | 40                                       | 10                                                  | 10                                                      |

**Supplementary Table S2. Fiber composition of the feed mixtures.**

| <b>Feed mixture</b> | <b>C/N ratio</b> | <b>Glucan (%TS)</b> | <b>Xylan (%TS)</b> | <b>Lignin (%TS)</b> | <b>pH*</b> |
|---------------------|------------------|---------------------|--------------------|---------------------|------------|
| FM1                 | 12.2             | 20.03               | 11.0               | 17.1                | 7.34       |
| FM2                 | 13.7             | 21.7                | 10.4               | 17.0                | 6.28       |
| FM3                 | 14.2             | 23.5                | 9.8                | 17.0                | 6.00       |

\*Before adjustment to 6.8.

Supplementary Figure S1

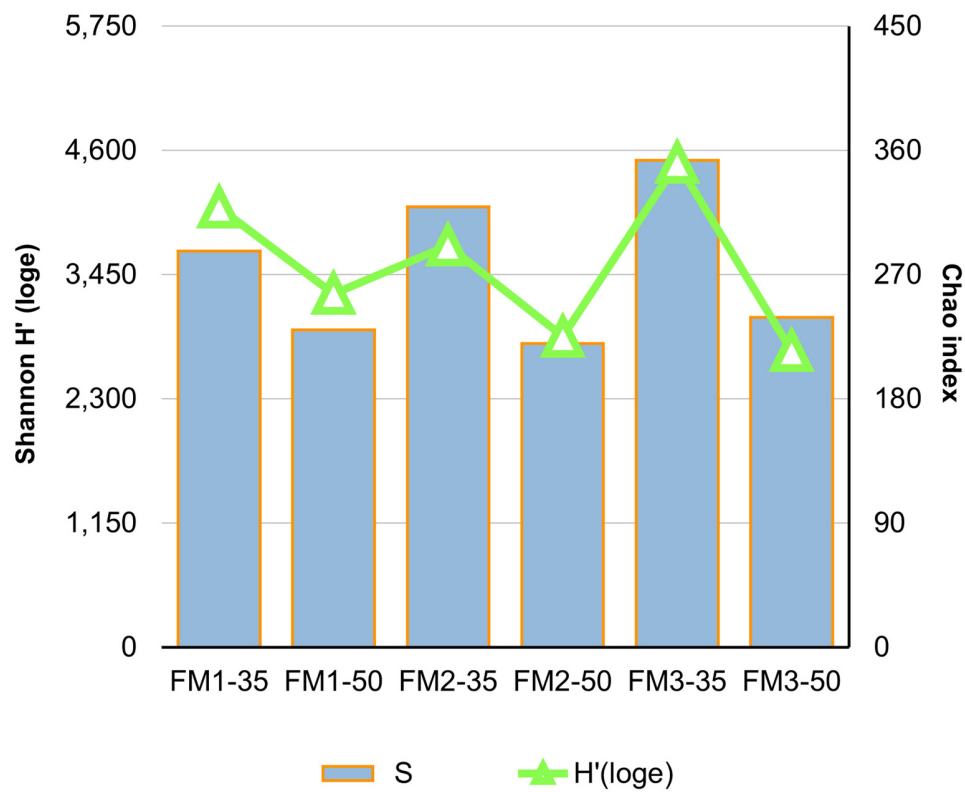

**SM-Figure S1.** Shannon's diversity ( $H'$ ) and Chao index of richness based on 16S rRNA sequencing data of Bacteria and Archaea.

## Supplementary Figure S2

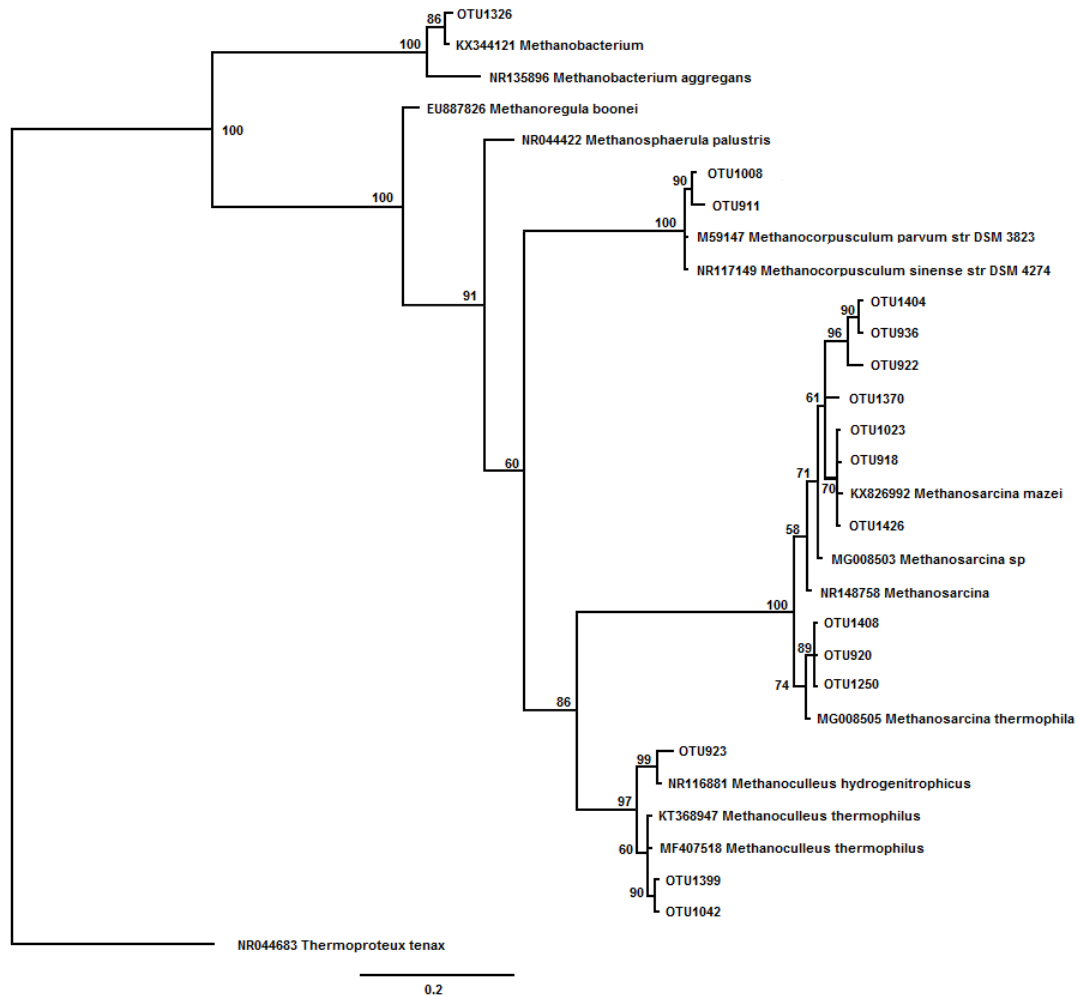

**SM-Figure S2.** Bayesian tree based on 16S rRNA gene sequences showing the position of OTU classified as Euryarchaeota. Bootstrap values based on 10,000,000 replications are shown at branch nodes. *Thermoproteus tenax* was used as outgroup. Bar shows 0.06 substitutions per nucleotide.
