# Supplementary material
Source: MDPI journal article supplement (https://www.mdpi.com/1996-1073/15/9/3252)
Supplement: s1 [file s1]

Archive with 3 entries (3 files):
- Biogas productionUCRMSU_SupplementaryInformation_WL.pdf
- SupplementaryTable_S3.xlsx
- SupplementaryTable_S4.xlsx
