# Supplementary material
Source: MDPI journal article supplement (https://www.mdpi.com/1996-1073/15/9/3252)
Supplement: s1 [file s1 › SupplementaryTable_S3.xlsx]

## Sheet: SM-Table S3
Accession N°	OTUID	GENUS	FM1-35	FM2-35	FM3-35	FM1-50	FM2-50	FM3-50	PHYLUM	CLASS	ORDER	FAMILY	MOST CLOSELY RELATED ORGANISM (ACCESION NUMBER)	SEQUENCE SIMILARITY %
MK912231	1326	Methanobacterium	84	67	44	0	0	0	Euryarchaeota	Methanobacteria	Methanobacteriales	Methanobacteriaceae	Uncultured Methanobacterium sp. (MG804516)	100
MK912232	1008	Methanocorpusculum	182	330	509	0	0	0	Euryarchaeota	Methanomicrobia	Methanomicrobiales	Methanocorpusculaceae	Uncultured archaeon (KM999483)	99
MK912233	911	Methanocorpusculum	305	472	852	0	0	0	Euryarchaeota	Methanomicrobia	Methanomicrobiales	Methanocorpusculaceae	Uncultured archaeon (KM999483)	99
MK912234	1023	Methanosarcina mazei	26	31	187	0	0	0	Euryarchaeota	Methanomicrobia	Methanosarcinales	Methanosarcinaceae	Uncultured Methanosarcina sp. (KY172649)	100
MK912194	1426	Methanosarcina mazei	88	120	800	15	37	14	Euryarchaeota	Methanomicrobia	Methanosarcinales	Methanosarcinaceae	Uncultured Methanosarcina sp. (KY172649)	100
MK912235	1370	Methanosarcina mazei	37	25	222	0	0	0	Euryarchaeota	Methanomicrobia	Methanosarcinales	Methanosarcinaceae	Methanosarcina sp (MG008503)	99
MK912236	918	Methanosarcina mazei	30	59	359	0	0	0	Euryarchaeota	Methanomicrobia	Methanosarcinales	Methanosarcinaceae	Uncultured Methanosarcina sp. (KY172649)	100
MK912237	936	un. Methanomicrobia	66	192	528	1	0	0	Euryarchaeota	Methanomicrobia	un. Methanomicrobia	un. Methanomicrobia	Uncultured methanogenic archaeon (KY612167)	99
MK912238	1404	un. Methanomicrobia	106	57	82	0	2	0	Euryarchaeota	Methanomicrobia	un. Methanomicrobia	un. Methanomicrobia	Uncultured methanogenic archaeon (KY612167)	99
MK912239	922	un. Methanomicrobia	203	4	82	0	1	1	Euryarchaeota	Methanomicrobia	un. Methanomicrobia	un. Methanomicrobia	Methanosarcina barkeri (HQ591417)	99
MK912181	1408	Methanosarcina	8	6	99	647	1919	762	Euryarchaeota	Methanomicrobia	Methanosarcinales	Methanosarcinaceae	Uncultured Methanosarcina sp. (KF971874)	100
MK912240	920	Methanosarcina	30	0	13	88	218	90	Euryarchaeota	Methanomicrobia	Methanosarcinales	Methanosarcinaceae	Uncultured Methanosarcina sp. (KF971874)	100
MK912241	1250	Methanosarcina	1	0	7	27	97	37	Euryarchaeota	Methanomicrobia	Methanosarcinales	Methanosarcinaceae	Uncultured Methanosarcina sp. (KF971874)	100
MK912242	1399	Methanoculleus	0	0	1	98	358	264	Euryarchaeota	Methanomicrobia	Methanomicrobiales	Methanomicrobiaceae	Methanoculleus thermophilus (MF407518)	99
MK912243	923	Methanoculleus	0	0	0	284	40	31	Euryarchaeota	Methanomicrobia	Methanomicrobiales	Methanomicrobiaceae	Methanoculleus hydrogenitrophicus (NR_116881)	99
MK912244	1042	Methanoculleus	0	0	1	366	522	401	Euryarchaeota	Methanomicrobia	Methanomicrobiales	Methanomicrobiaceae	Methanoculleus thermophilus (MF407518)	99
