# Supplementary material
Source: MDPI journal article supplement (https://www.mdpi.com/1996-1073/15/9/3252)
Supplement: s1 [file s1 › SupplementaryTable_S4.xlsx]

## Sheet: SM-Table S4
SPECIES	FM1-35	FM2-35	FM3-35	FM1-50	FM2-50	FM3-50	KINGDOM	PHYLUM	CLASS	ORDER	FAMILY	GENUS	SPECIES	TOTAL
Methanosarcina thermophila (OTU1408)	8	6	99	647	1919	762	Archaea	Euryarchaeota	Methanomicrobia	Methanosarcinales	Methanosarcinaceae	Methanosarcina	Methanosarcina thermophila (OTU1408)	3440
Macellibacteroides fermentans (OTU1359)	226	155	80	2494	285	36	Bacteria	Bacteroites	Bacteroidia	Bacteroidales	Porphyromonadaceae	Macellibacteroides	Macellibacteroides fermentans (OTU1359)	3275
Petrimonas sulfuriphila (OTU1383)	3134	5948	3867	1	0	3	Bacteria	Bacteroites	Bacteroidia	Bacteroidales	Porphyromonadaceae	Petrimonas	Petrimonas sulfuriphila (OTU1383)	12953
Proteiniphilum sp. (OTU1402)	1278	305	395	7	4	6	Bacteria	Bacteroites	Bacteroidia	Bacteroidales	Porphyromonadaceae	Proteiniphilum	Proteiniphilum sp. (OTU1402)	1993
Prevotella sp. (OTU1340)	1223	226	1883	0	0	1	Bacteria	Bacteroites	Bacteroidia	Bacteroidales	Prevotellaceae	Prevotella	Prevotella sp. (OTU1340)	3332
Prevotella sp. (OTU1341)	53	4	1143	1	0	0	Bacteria	Bacteroites	Bacteroidia	Bacteroidales	Prevotellaceae	Prevotella	Prevotella sp. (OTU1341)	1200
Prevotella sp. (OTU1350)	1239	190	1753	0	0	1	Bacteria	Bacteroites	Bacteroidia	Bacteroidales	Prevotellaceae	Prevotella	Prevotella sp. (OTU1350)	3182
Prevotella sp. (OTU1495)	6	1	2143	0	0	0	Bacteria	Bacteroites	Bacteroidia	Bacteroidales	Prevotellaceae	Prevotella	Prevotella sp. (OTU1495)	2149
Prevotella sp. OTU1503)	49	5	1259	0	0	0	Bacteria	Bacteroites	Bacteroidia	Bacteroidales	Prevotellaceae	Prevotella	Prevotella sp. OTU1503)	1312
un. Bacteroidales (OTU-1505)	355	1252	4945	0	0	0	Bacteria	Bacteroites	Bacteroidia	Bacteroidales	un. Bacteroidales	un. Bacteroidales	un. Bacteroidales (OTU-1505)	6552
un. Bacteroidales (OTU106)	14603	73	218	0	1	0	Bacteria	Bacteroites	Bacteroidia	Bacteroidales	un. Bacteroidales	un. Bacteroidales	un. Bacteroidales (OTU106)	14894
un. Bacteroidales (OTU1341,1)	13285	4385	1111	0	0	0	Bacteria	Bacteroites	Bacteroidia	Bacteroidales	un. Bacteroidales	un. Bacteroidales	un. Bacteroidales (OTU1341,1)	18781
un. Bacteroidales (OTU1396)	434	3444	1594	0	0	2	Bacteria	Bacteroites	Bacteroidia	Bacteroidales	un. Bacteroidales	un. Bacteroidales	un. Bacteroidales (OTU1396)	5473
un. Bacteroidales (OTU476)	1767	19	11	0	0	0	Bacteria	Bacteroites	Bacteroidia	Bacteroidales	un. Bacteroidales	un. Bacteroidales	un. Bacteroidales (OTU476)	1797
un. Marinilabiliaceae (OTU1376)	901	789	1451	2005	807	329	Bacteria	Bacteroites	Bacteroidia	Marinilabiliales	Marinilabiliaceae	un. Marinilabiliaceae	un. Marinilabiliaceae (OTU1376)	6281
un. Prolixibacteraceae (OTU1474)	2051	3	0	0	0	0	Bacteria	Bacteroites	Bacteroidia	Marinilabiliales	Prolixibacteraceae	un. Prolixibacteraceae	un. Prolixibacteraceae (OTU1474)	2054
un. Anaerolinaceae (OTU264)	1280	13	8	0	0	0	Bacteria	Chloroflexi	Anaerolineae	Anaerolinaeles	Anaerolinaceae	un. Anaerolinaceae	un. Anaerolinaceae (OTU264)	1301
Anaerolinea sp. (OTU123)	24	64	204	2958	2310	1731	Bacteria	Chloroflexi	Anaerolineae	Anaerolineales	Anaerolinaceae	Anaerolinea	Anaerolinea sp. (OTU123)	7290
Anaerolinea sp. (OTU1425)	27	94	268	3991	3251	2307	Bacteria	Chloroflexi	Anaerolineae	Anaerolineales	Anaerolinaceae	Anaerolinea	Anaerolinea sp. (OTU1425)	9937
un. Anaerolinaceae (OTU126)	0	6	32	1612	1586	1193	Bacteria	Chloroflexi	Anaerolineae	Anaerolineales	Anaerolinaceae	un. Anaerolinaceae	un. Anaerolinaceae (OTU126)	4428
un. Anaerolinaceae (OTU1275)	144	1540	3594	34548	58472	66384	Bacteria	Chloroflexi	Anaerolineae	Anaerolineales	Anaerolinaceae	un. Anaerolinaceae	un. Anaerolinaceae (OTU1275)	164681
un. Anaerolinaceae (OTU1317)	5403	1394	0	0	0	0	Bacteria	Chloroflexi	Anaerolineae	Anaerolineales	Anaerolinaceae	un. Anaerolinaceae	un. Anaerolinaceae (OTU1317)	6796
un. Anaerolinaceae (OTU1377)	1306	185	0	0	0	0	Bacteria	Chloroflexi	Anaerolineae	Anaerolineales	Anaerolinaceae	un. Anaerolinaceae	un. Anaerolinaceae (OTU1377)	1491
un. Anaerolinaceae (OTU95)	1	9	31	1647	1641	1267	Bacteria	Chloroflexi	Anaerolineae	Anaerolineales	Anaerolinaceae	un. Anaerolinaceae	un. Anaerolinaceae (OTU95)	4595
Aneurinibacillus tyrosinisolvens (OTU1349)	0	27035	3	0	1	20	Bacteria	Firmicutes	Bacilli	Bacillales	Paenibacillaceae	Aneurinibacillus	Aneurinibacillus tyrosinisolvens (OTU1349)	27058
un. Christensenellaceae (OTU30)	5	29	1534	0	0	1	Bacteria	Firmicutes	Clostridia	Clostridiales	Christensenellaceae	un. Christensenellaceae	un. Christensenellaceae (OTU30)	1568
Acetivibrio cellulolyticus (OTU1464)	820	737	1757	321	504	309	Bacteria	Firmicutes	Clostridia	Clostridiales	Clostridiaceae	Acetivibrio	Acetivibrio cellulolyticus (OTU1464)	4447
Clostridium sp. (OTU1316)	3	4	44	2705	3220	2924	Bacteria	Firmicutes	Clostridia	Clostridiales	Clostridiaceae	Clostridium	Clostridium sp. (OTU1316)	8899
Anaerotaenia torta (OTU1496)	0	0	13	2033	1902	3094	Bacteria	Firmicutes	Clostridia	Clostridiales	Lachnospiraceae	Anaerotaenia	Anaerotaenia torta (OTU1496)	7042
Herbinix sp. (OTU1466)	0	0	8	1171	1018	1337	Bacteria	Firmicutes	Clostridia	Clostridiales	Lachnospiraceae	Herbinix	Herbinix sp. (OTU1466)	3533
un. Peptococcaceae (OTU100)	0	0	1	1126	179	186	Bacteria	Firmicutes	Clostridia	Clostridiales	Peptococcaceae	un. Peptococcaceae	un. Peptococcaceae (OTU100)	1490
un. Ruminococcaceae (OTU1432)	1	0	25	1182	2134	2201	Bacteria	Firmicutes	Clostridia	Clostridiales	Ruminococcaceae	un. Ruminococcaceae	un. Ruminococcaceae (OTU1432)	5542
Syntrophomonas sp. (OTU1482)	3751	786	2530	0	0	0	Bacteria	Firmicutes	Clostridia	Clostridiales	Syntrophomonadaceae	Syntrophomonas	Syntrophomonas sp. (OTU1482)	7067
un. Thermincola (OTU1385)	3591	1807	624	0	0	0	Bacteria	Firmicutes	Clostridia	Clostridiales	Thermincola	un. Thermincola	un. Thermincola (OTU1385)	6022
un. Thermincola (OTU99)	943	1043	341	1	0	0	Bacteria	Firmicutes	Clostridia	Clostridiales	Thermincola	un. Thermincola	un. Thermincola (OTU99)	2326
Sedimentibacter sp. (OTU1270)	2457	218	325	16	6	2	Bacteria	Firmicutes	Clostridia	Clostridiales	Tissierellaceae	Sedimentibacter	Sedimentibacter sp. (OTU1270)	3022
Acidaminococcus sp. (OTU1337)	1259	400	151	5	1	2	Bacteria	Firmicutes	Negativicutes	Acidaminococcales	Acidaminococcaceae	Acidaminococcus	Acidaminococcus sp. (OTU1337)	1816
Succiniclasticum ruminis (OTU1512)	0	187	1202	0	0	1	Bacteria	Firmicutes	Negativicutes	Acidaminococcales	Acidaminococcaceae	Negativicutes	Succiniclasticum ruminis (OTU1512)	1389
Succiniclasticum ruminis (OTU1276)	1	185	1177	0	0	0	Bacteria	Firmicutes	Negativicutes	Acidaminococcales	Acidaminococcaceae	Succiniclasticum	Succiniclasticum ruminis (OTU1276)	1363
un. Hydrogenispora (OTU1375)	1	2	19	2655	2843	3030	Bacteria	Firmicutes	Negativicutes	Hydrogenispora	Hydrogenispora	un. Hydrogenispora	un. Hydrogenispora (OTU1375)	8549
un. Hydrogenispora (OTU1447)	0	0	2	1146	1506	2527	Bacteria	Firmicutes	Negativicutes	Hydrogenispora	Hydrogenispora	un. Hydrogenispora	un. Hydrogenispora (OTU1447)	5181
un. Hydrogenispora (OTU1466)	2	0	20	2613	2744	2856	Bacteria	Firmicutes	Negativicutes	Hydrogenispora	Hydrogenispora	un. Hydrogenispora	un. Hydrogenispora (OTU1466)	8235
un. Hydrogenispora (OTU1477)	40	39	37	1075	830	306	Bacteria	Firmicutes	Negativicutes	Hydrogenispora	Hydrogenispora	un. Hydrogenispora	un. Hydrogenispora (OTU1477)	2325
un. Sporomusaceae (OTU504)	0	2	18	940	1856	1978	Bacteria	Firmicutes	Negativicutes	Selenomonadales	Sporomusaceae	un. Sporomusaceae	un. Sporomusaceae (OTU504)	4792
Advenella alkanexedens (OTU1513)	332	1990	121	6	6	11	Bacteria	Proteobacteria	Betaproteobacteria	Burkholriales	Alcaligenaceae	Advenella	Advenella alkanexedens (OTU1513)	2465
Treponema sp. (OTU1364)	3323	3320	3489	0	1	0	Bacteria	Spirochaetes	Spirochaetes	Spirochaetales	Spirochaetaceae	Treponema	Treponema sp. (OTU1364)	10132
Synergistes jonesii (OTU1481)	1528	3917	10819	0	0	4	Bacteria	Synergistetes	Synergistia	Synergistales	Synergistaceae	Synergistes	Synergistes jonesii (OTU1481)	16268
un. Synergistaceae (OTU1330)	2220	269	105	0	0	0	Bacteria	Synergistetes	Synergistia	Synergistales	Synergistaceae	un. Synergistaceae	un. Synergistaceae (OTU1330)	2594
un. Synergistaceae (OTU1444)	1594	1517	2363	0	0	1	Bacteria	Synergistetes	Synergistia	Synergistales	Synergistaceae	un. Synergistaceae	un. Synergistaceae (OTU1444)	5474
un. R4-41B (OTU-1390)	385	3149	4283	0	0	1	Bacteria	Verrucomicrobia	Pedosphaerae	Pedosphaerales	R4-41B	un. R4-41B	un. R4-41B (OTU-1390)	7817
